# Supplementary material for: Identification and Characterization of Two Bibenzyl Glycosyltransferases from the Liverwort Marchantia polymorpha
Source: MDPI journal article supplement (doi:10.3390/antiox11040735), 2022-04-08
Supplement: s1 [file s1]

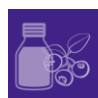

# Identification and Characterization of Two Bibenzyl Glycosyltransferases from the Liverwort *Marchantia polymorpha*

## Supplementary Materials

**Table S1** Primers for cloning the full length cDNAs.

| Primer Name                | Accession Number | Primer Sequences (5' to 3')          |
|----------------------------|------------------|--------------------------------------|
| <i>MpUGT737B1</i> -BamHI-F | PTQ47498         | CGGGATCCCATGGAGTTGACGAACGGGAC        |
| <i>MpUGT737B1</i> -NotI-R  | PTQ47498         | ATAAGAATGCGGCCGCTTACACCATCACGAGGTCTT |
| <i>MpUGT741A1</i> -BamHI-F | PTQ40596         | CGGGATCCATGGGTTTACATGTGGAGCG         |
| <i>MpUGT741A1</i> -NotI-R  | PTQ40596         | ATAAGAATGCGGCCGCTCATCTAACCCTCTGAACCT |

**Table S2** Primers for qRT-PCR.

| Primer Name             | Accession Number | Primer Sequences (5' to 3') |
|-------------------------|------------------|-----------------------------|
| <i>MpUGT737B1</i> -RT-F | PTQ47498         | AGAGGATAGACATTACAGGC        |
| <i>MpUGT737B1</i> -RT-R | PTQ47498         | TTCAGCCACTTCAAACACTC        |
| <i>MpUGT741A1</i> -RT-F | PTQ40596         | TGGGCTCGTATTCAACTCCT        |
| <i>MpUGT741A1</i> -RT-R | PTQ40596         | CTTTTTTCCACGGGCTTAGT        |

**Table S3** Primers for GFP fusions.

| Primer Name              | Accession Number | Primer Sequences (5' to 3')                             |
|--------------------------|------------------|---------------------------------------------------------|
| <i>MpUGT737B1</i> -GFP-F | PTQ47498         | GGGGACAAGTTTGTACAAAAAA-GCAGGCTTAACCATGGAGTTGACGAACGGGAC |
| <i>MpUGT737B1</i> -GFP-R | PTQ47498         | GGGGACCACTTTGTACAAGAAA-GCTGGGTCCACCATCACGAGGTCTTGGA     |
| <i>MpUGT741A1</i> -GFP-F | PTQ40596         | GGGGACAAGTTTGTACAAAAAA-GCAGGCTTAACCATGGGTTTACATGTGGAGCG |
| <i>MpUGT741A1</i> -GFP-R | PTQ40596         | GGGGACCACTTTGTACAAGAAA-GCTGGGTCTCTAACCCTCTGAACCTCGG     |

**Table S4** <sup>1</sup>H NMR spectral data of phloretin-4-O-glucoside.

| position | Phloretin-4-O-glucoside <sup>a</sup> |
|----------|--------------------------------------|
|          | δ <sub>H</sub>                       |
| 2        | 7.15 d                               |
| 3        | 7.01 d                               |
| 5        | 7.01 d                               |
| 6        | 7.15 d                               |

|             |                   |
|-------------|-------------------|
| $\alpha$ -H | 2.90 m            |
| $\beta$ -H  | 3.27 m            |
| 3'          | 5.80 s            |
| 5'          | 5.80 s            |
| G-1         | 4.87 (overlapped) |
| G-2-7       | 3.34–3.90 m       |

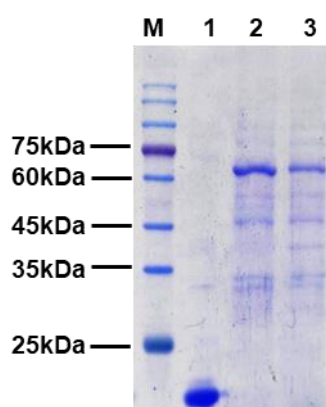

**Figure S1.** SDS–PAGE separation of recombinant *MpUGT737B1* and *MpUGT741A1*. M: molecular mass standards; Lanes 1, 2, 3: pET32a purified protein (empty vector control), *MpUGT737B1* purified protein, *MpUGT741A1* purified protein.

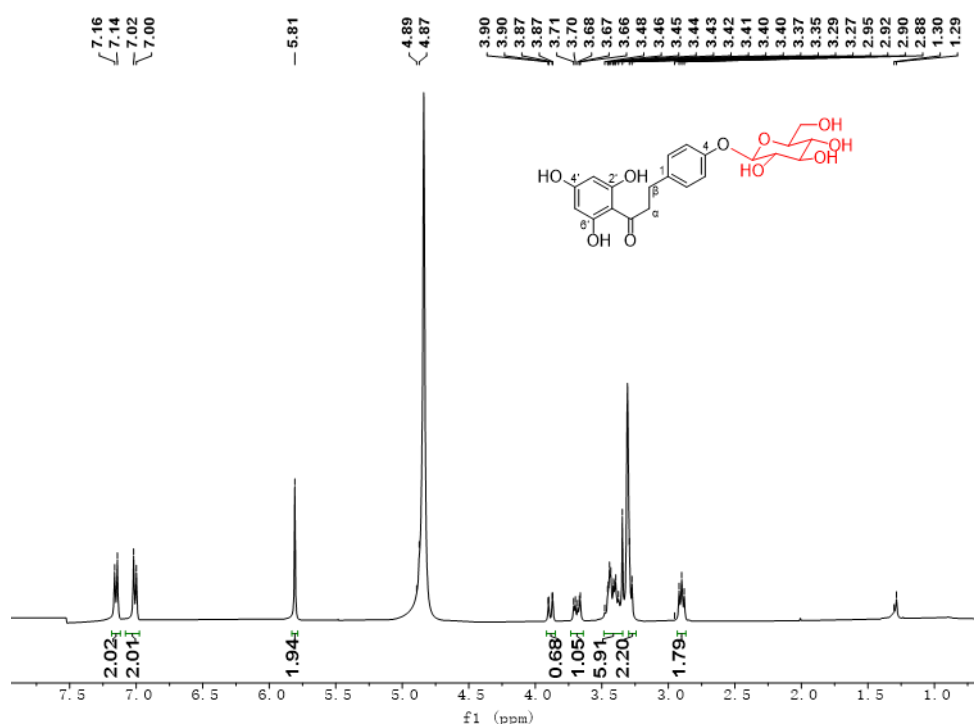

**Figure S2.** The  $^1\text{H}$  NMR spectrum of phloretin-4-*O*-glucoside in methanol- $d_4$  (400 MHz).  $^1\text{H}$  NMR (Methanol- $d_4$ , 400 MHz):  $\delta$  = 2.90 (2H, m, H- $\alpha$ ), 3.27 (2H, m, H- $\beta$ ), 3.34–3.90 (6H, m, Glc), 4.87 (1H, overlapped, G-1), 5.80 (2H, s, H-3v/H-5'), 7.01 (2H, d,  $J$  = 8.4 Hz, H-3/H-5), 7.15 (2H, d,  $J$  = 8.4 Hz, H-2/H-6).

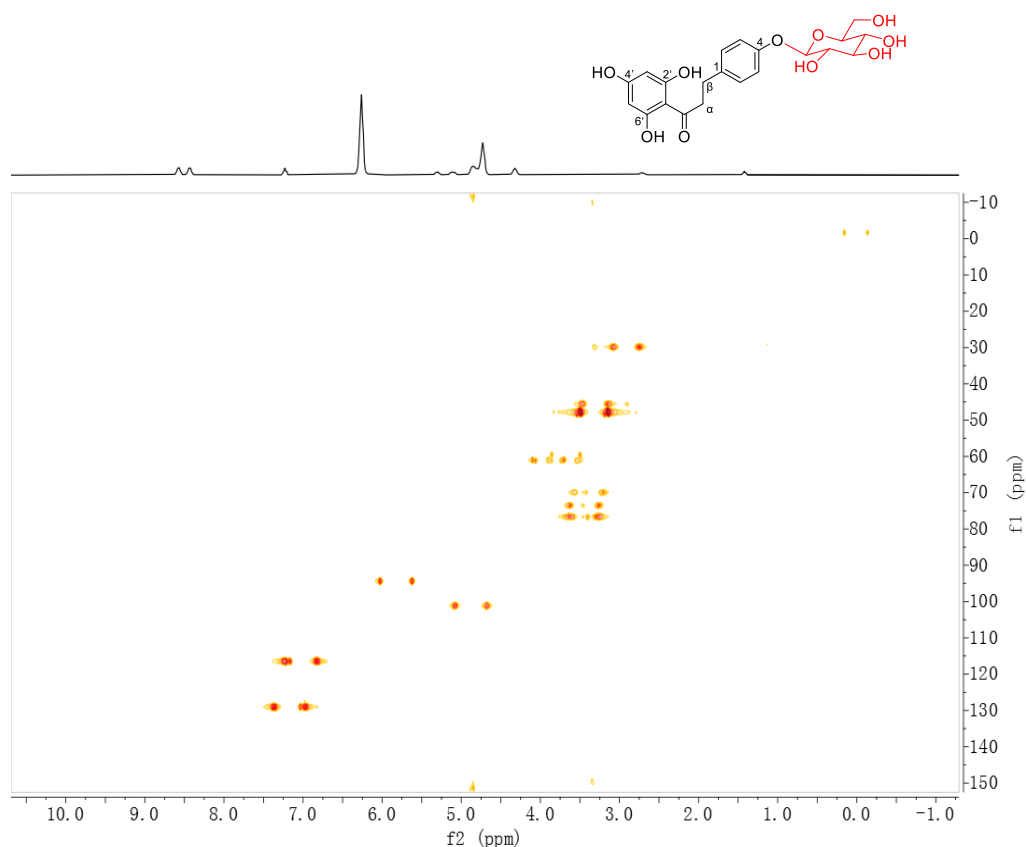

Figure S3. The HSQC spectrum of phloretin-4-*O*-glucoside in methanol- $d_4$  (400 MHz).

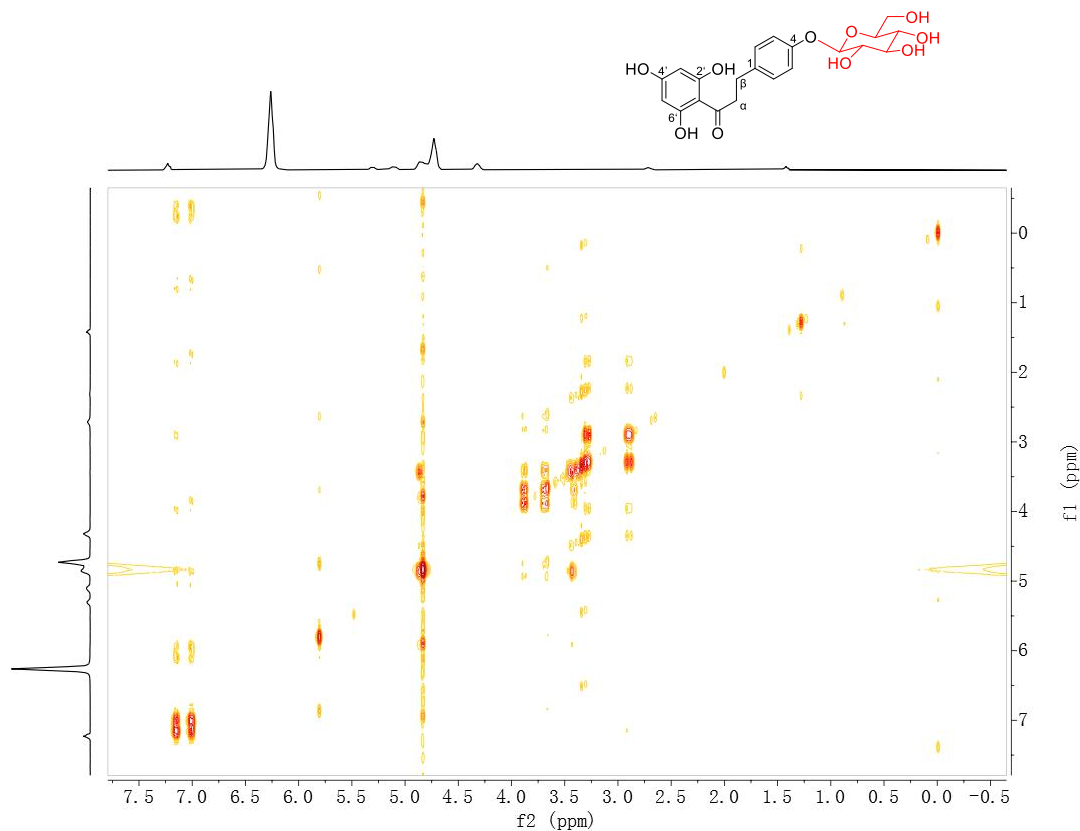

Figure S4. The  $^1\text{H}$ - $^1\text{H}$  COSY spectrum of phloretin-4-*O*-glucoside in methanol- $d_4$  (400 MHz).

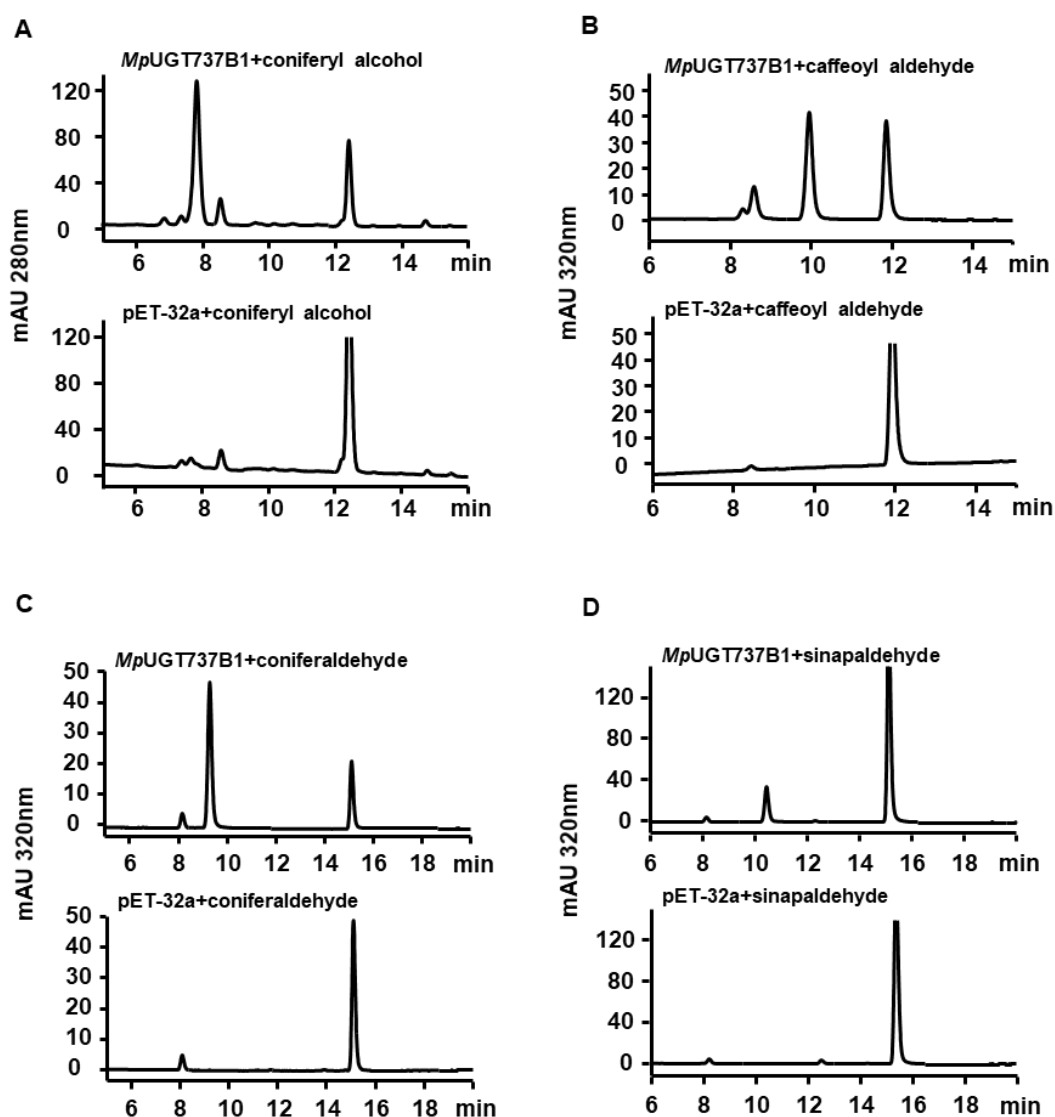

**Figure S5.** HPLC analysis of the products generated by the proteins of *MpUGT737B1* using phenylpropanoid. The enzymatic reaction uses coniferyl alcohol (A), caffeoyl aldehyde (B), coniferaldehyde (C) and sinapaldehyde (D) as substrates.

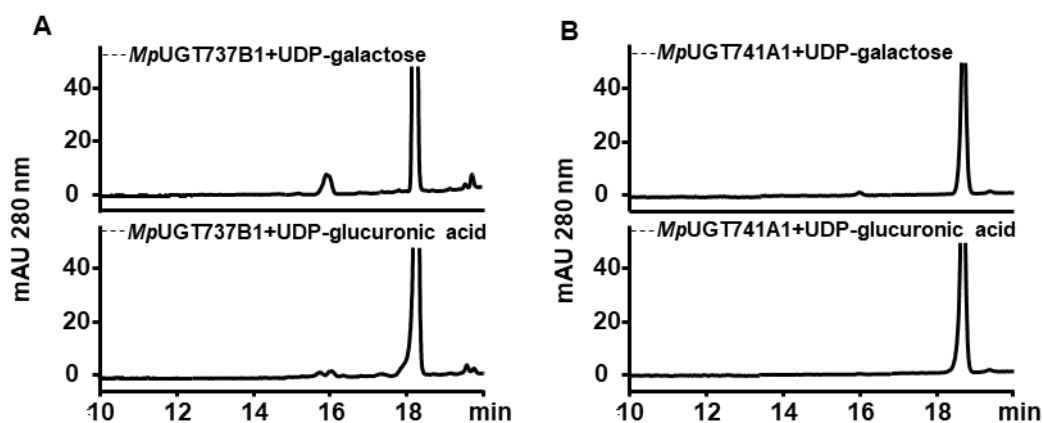

**Figure S6.** Functional assays of *MpUGTs* recombinant proteins using UDP-galactose and UDP-glucuronic acid as the donor. (A) Functional assays of recombinant *MpUGT737B1* using phloretin as the acceptor. (B) Functional assays of recombinant *MpUGT741A1* using lunularin as the acceptor.

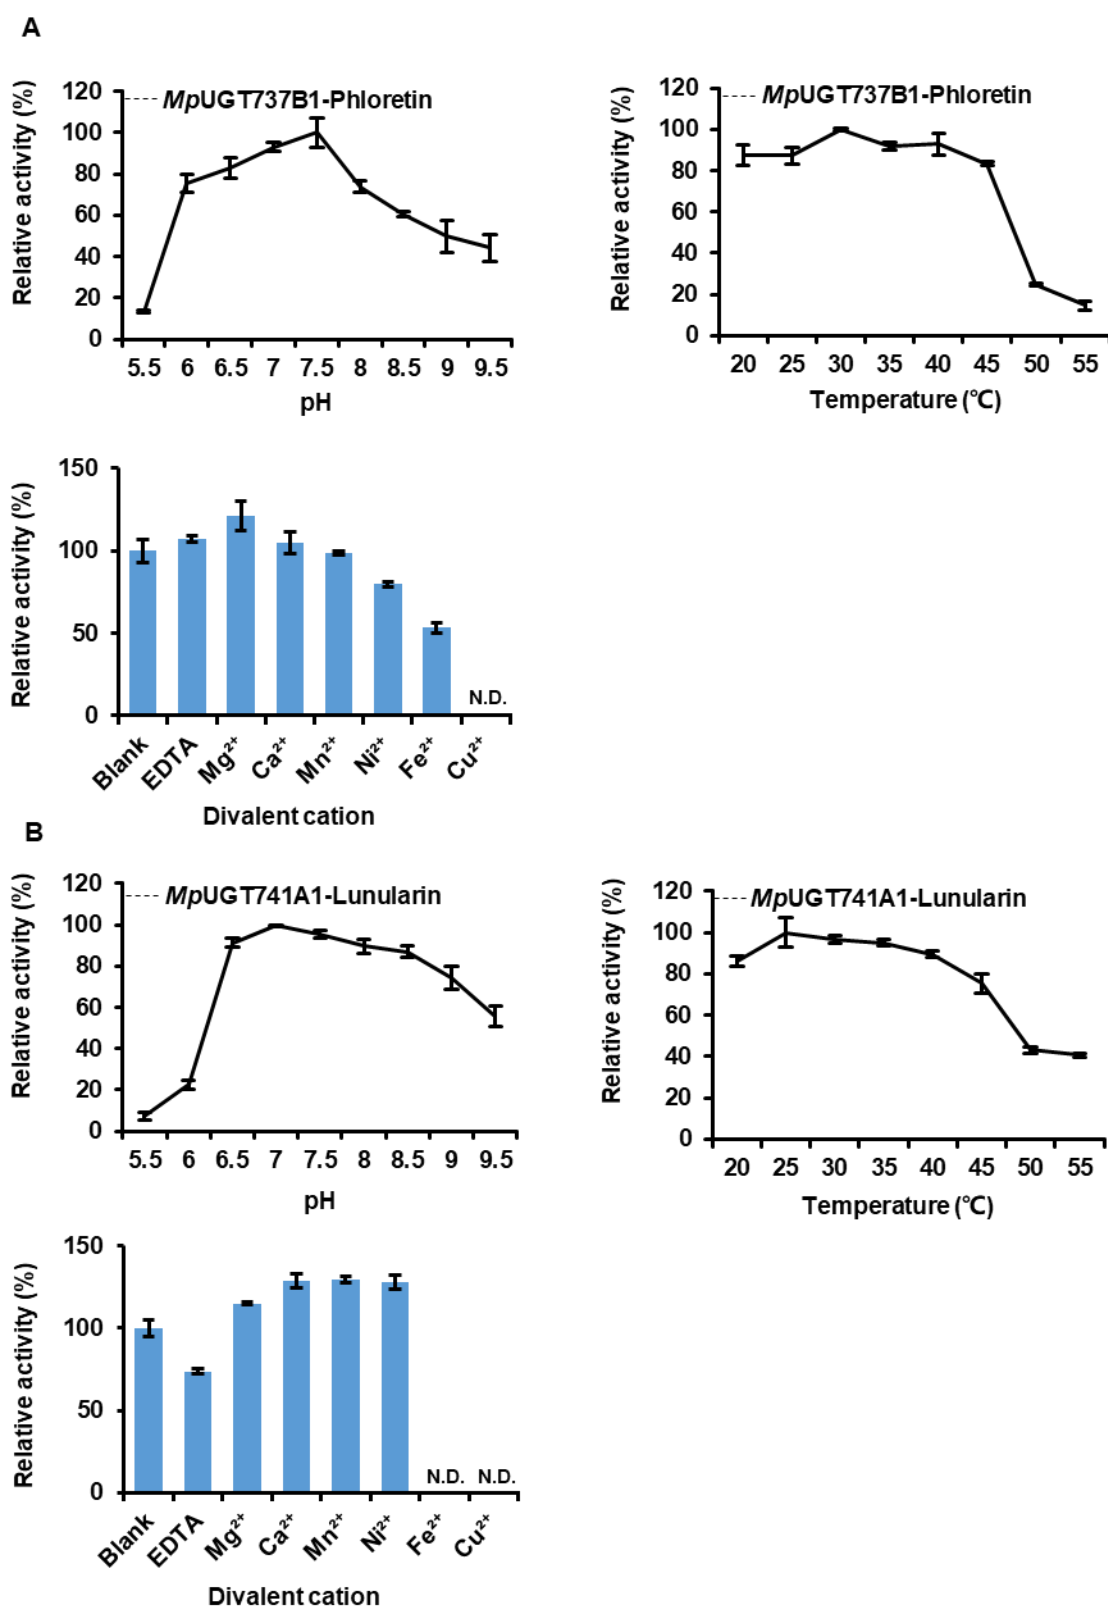

**Figure S7.** Effects of reaction pH, temperature and divalent metal ions on the activity of *MpUGT737B1* (A) and *MpUGT741A1* (B). Phloretin was used as the acceptor and UDP-glucose was used as the sugar donor for *MpUGT737B1*. Lunularin was used as the acceptor and UDP-glucose was used as the sugar donor for *MpUGT741A1*.

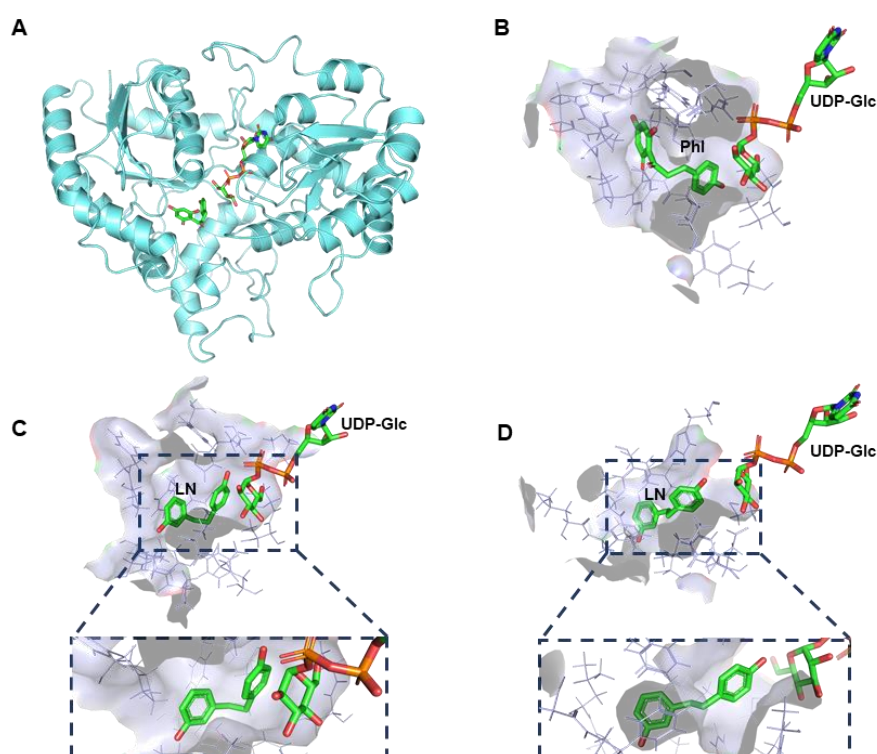

**Figure S8.** The three-dimensional crystal modeling and molecular docking analysis of *MpUGT737B1* and *MpUGT741A1* protein. (A) The structural model of *MpUGT737B1* docked with UDP-glucose and phloretin. (B) The substrate-binding pocket in a model of *MpUGT737B1* docking with phloretin (Phl). (C) The substrate-binding pocket in a model of *MpUGT737B1* docking with lunularin (LN). (D) The substrate-binding pocket in a model of *MpUGT741A1* docking with lunularin.

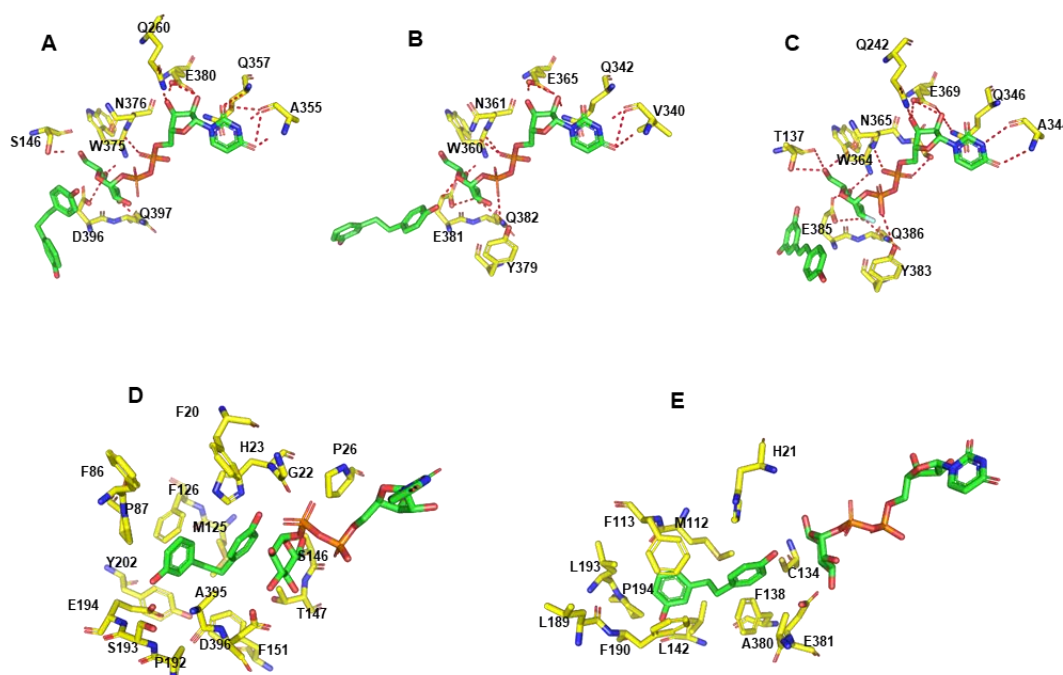

**Figure S9.** Substrate binding sites in protein 3D structures. (A) Substrates lunularin and UDP-glucose in the structure of *MpUGT737B1* protein and amino acid residues that hydrogen bond with the UDP-sugar

donor. (B) Substrates lunularin and UDP-glucose in the structure of *MpUGT741A1* protein and amino acid residues that hydrogen bond with the UDP-sugar donor. (C) Substrates in the structure of *PaGT2* protein (PDB: 6jem) and amino acid residues that hydrogen bond with the UDP-sugar donor. (D) Amino acids residues in the 4Å range around the lunularin in the *MpUGT737B1* protein structure and (E) *MpUGT741A1* protein structure. Hydrogen bonds are represented by red dotted lines.

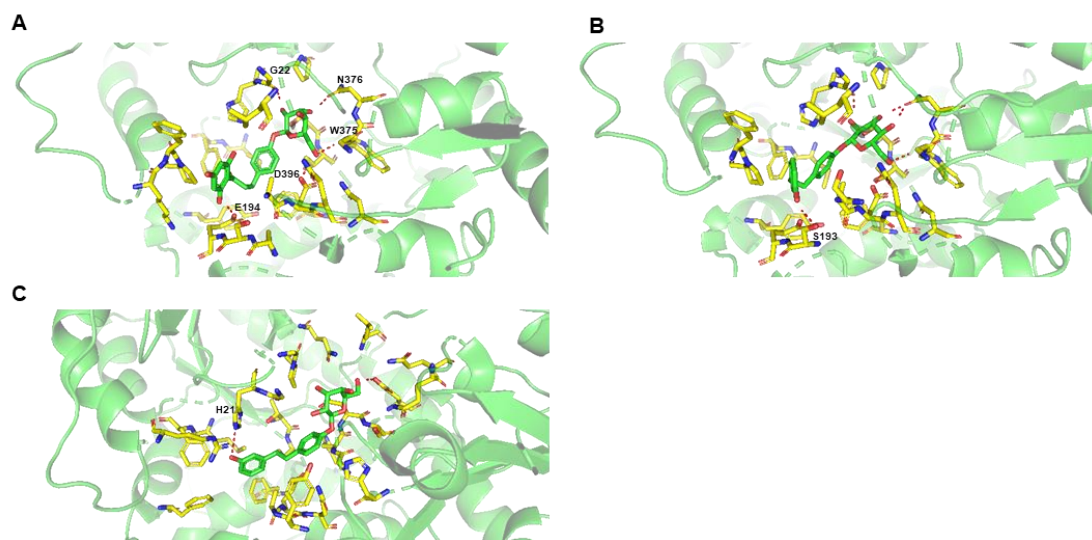

**Figure S10. Molecular docking analysis of *MpUGTs* with glycoside products.** (A) Molecular docking analysis of *MpUGT737B1* with phloretin-4-*O*-glucoside. (B) Molecular docking analysis of *MpUGT737B1* with lunularin-4-*O*-glucoside. (C) Molecular docking analysis of *MpUGT741A1* with lunularin-4-*O*-glucoside.
